# Supplementary material for: In situ interfacial surface modification of hydrophilic silica nanoparticles by two organosilanes leading to stable Pickering emulsions
Source: Royal Society of Chemistry journal article supplement (doi:10.1039/c9ra07597f), 2019-01-01
Supplement: c9ra07597f1.pdf [file c9ra07597f1.pdf]

## ***In Situ* Interfacial Surface Modification of Hydrophilic Silica Nanoparticles by Two Organosilanes Leading to Stable Pickering Emulsions**

### **Supporting Information**

Yafit Itzhaik Alkotzer,<sup>†,1,a,§</sup> Franziska Grzegorzewski,<sup>†,1,a,§</sup> Eduard Belausov,<sup>†,2</sup> Einat Zelinger,<sup>‡</sup> and Guy Mechrez<sup>†,1,a,\*</sup>

<sup>†,1</sup>Department of Food Sciences, Institute of Postharvest and Food Sciences, Agricultural Research Organization (ARO), Volcani Center, 68 HaMaccabim Road, Rishon Letzion 7505101, Israel

<sup>a</sup>Agro-Nanotechnology and Advanced Materials Center, Agricultural Research Organization (ARO), Volcani Center, 68 HaMaccabim Road, Rishon Letzion 7505101, Israel

<sup>†,2</sup>Department of Ornamental Plants and Agricultural Biotechnology, Institute of Plant Sciences, Agricultural Research Organization (ARO), Volcani Center, 68 HaMaccabim Road, Rishon Letzion 7505101, Israel

<sup>‡</sup>The Interdepartmental Equipment Unit, The Robert H. Smith Faculty of Agriculture, Food and Environment, The Hebrew University of Jerusalem, POB 12, Rehovot 7610001, Israel

\*Corresponding Author: [guyme@volcani.agri.gov.il](mailto:guyme@volcani.agri.gov.il), Tel: +972-3-9683990.

Author Contribution:

§ These authors contributed equally to the research.

### **1. Pickering emulsions stabilized by silica.**

Droplet size analysis of *in situ* functionalized silica-stabilized toluene-in-water emulsion was done over the time span of 4 weeks by measuring each week the droplet diameters from confocal microscopy images. The analysis showed a broader distribution indicative of droplet coalescence occurring with time, although the majority of the droplets analyzed still remained at the 2-20  $\mu\text{m}$  size range 4 weeks after preparation (Figure S1). Accordingly, the average droplet size diameter of the freshly prepared emulsion,  $11.4 \pm 6.4 \mu\text{m}$ , increased to  $13.2 \pm 12.0 \mu\text{m}$  4 weeks after preparation.

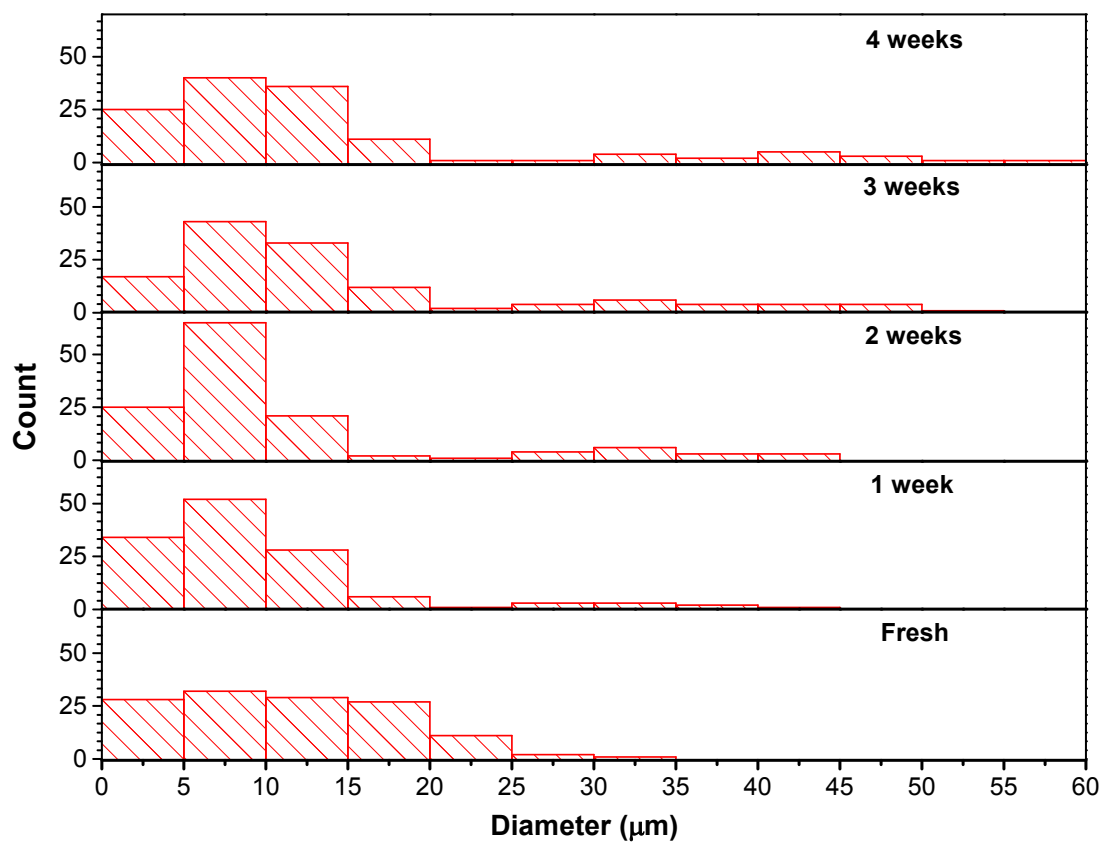

**Figure S1.** Droplet size distribution of 1:1 v/v toluene-in-water (o/w) emulsion stabilized by 1% w/v *in situ* modified silica nanoparticles, analyzed over a time span of 4 weeks after preparation (fresh – 4 weeks).

## 2. Silica nanoparticles at the oil-water interface.

The stabilization of the toluene droplets in water by silica was visualized in confocal fluorescence microscopy using a z-series stack, by tracing the localization of 6-aminofluorescein-labelled silica nanoparticles at the toluene-water interface and in the major water phase, and of Nile Red in the minor toluene phase, confirming oil-in-water Pickering emulsion (Figure S2).

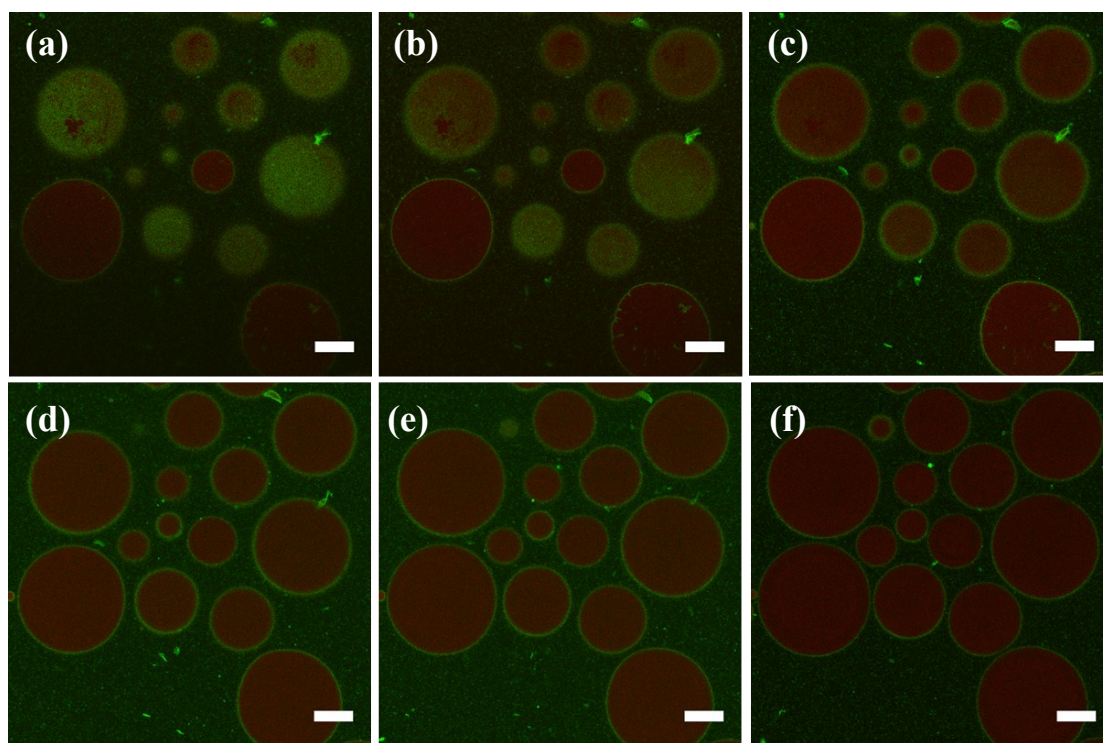

**Figure S2.** Confocal microscopy z stack overlay images of green and red channels showing the localization of 6-aminofluorescein-labelled  $\text{SiO}_2$  nanoparticles at the toluene-water interface. The oil droplets were stained with Nile Red fluorophore (scale bar 20  $\mu\text{m}$  in all images): (a) slice 12; (b) slice 15; (c) slice 18; (d) slice 24; (e) slice 30; (f) slice 33.

### 3. *In situ* functionalization of silica - control experiments with APTES.

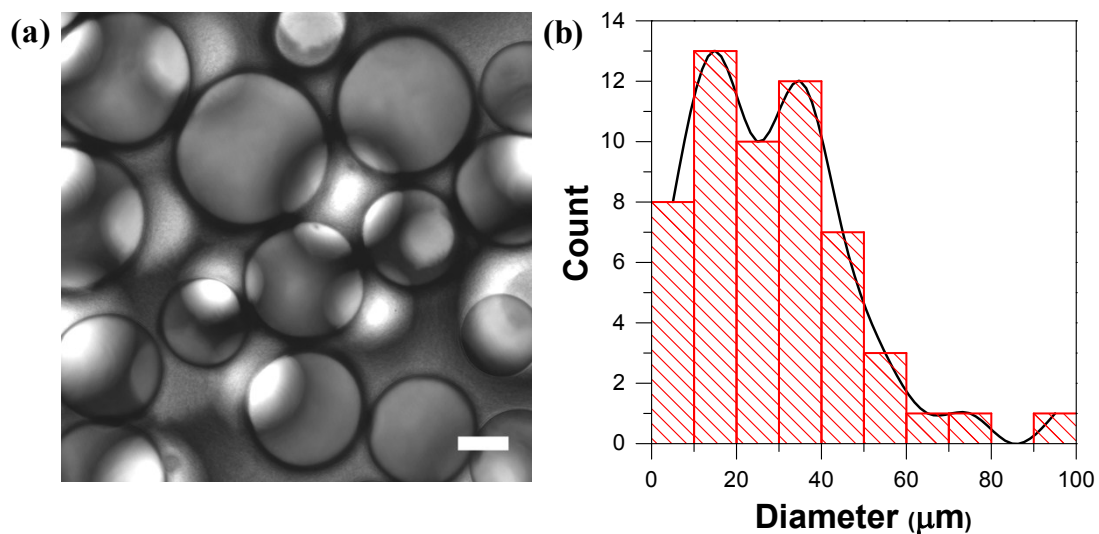

**Figure S3.** (a) Confocal microscopy image of a 1:1 v/v toluene-in-water (o/w) emulsion, stabilized by 1% w/v Aerosil® 300 silica nanoparticles that were functionalized *in situ* only with APTES (scale bar 20 μm). (b) Droplet size distribution of the o/w emulsion shown in (a). The average droplet diameter was larger than the *in situ* DTES-APTES-modified emulsion ( $29.0 \pm 18.9 \mu\text{m}$  compared to  $11.4 \pm 6.4 \mu\text{m}$ , respectively). The average droplet diameter increased to  $46.4 \pm 15.4 \mu\text{m}$  4 weeks after preparation, indicative of coalescence occurring with time.

### 4. Aerosil® 300 morphology characterization

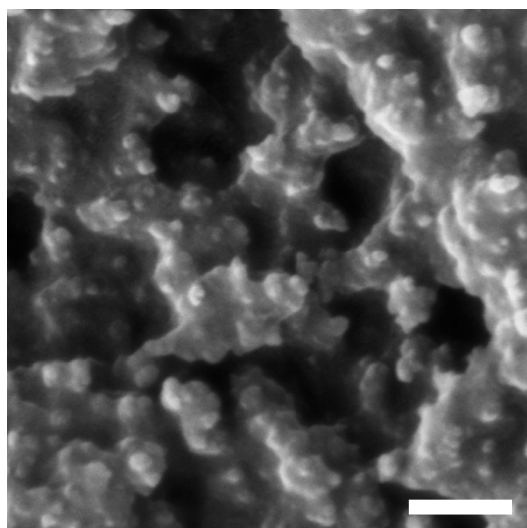

**Figure S4.** HRSEM micrograph of Aerosil® 300 fumed silica, showing the surface morphology and fine structure of the silica agglomerate. Scale bar is 200 nm.
